# Supplementary material for: Template-free synthesis of uniform mesoporous SnO2 nanospheres for efficient phosphopeptide enrichment
Source: Royal Society of Chemistry journal article supplement (doi:10.1039/c3tb21617a), 2013-12-19
Supplement: c3tb21617a.pdf [file c3tb21617a.pdf]

XXXXXXXXXXXX

---

## Supporting Information:

Template-free synthesis of uniform mesoporous SnO<sub>2</sub> nanospheres for efficient phosphopeptide enrichment

## Experimental Details

### Materials

β-casein, trypsin, 2,5-dihydroxybenzoic acid (2,5-DHB) were purchased from Sigma-Aldrich. Ammonium hydroxide and ammonium bicarbonate were purchased from Fluka. Trifluoroacetic acid (TFA) was from J&K Technologies Inc. Acetonitrile (ACN) was obtained from Dikma Technologies Inc. Water used in MS was from Hangzhou Wahaha Group Co., Ltd. Other reagents were obtained from Beijing Chemical Works. Nonfat milk was obtained from a local supermarket. All the chemicals were of analytical grade except TFA and ACN, which are of HPLC grade.

### Preparation of mSnO<sub>2</sub> and nSnO<sub>2</sub>

#### *Synthesis of Mesoporous SnO<sub>2</sub> Nanospheres (mSnO<sub>2</sub>)*

In a typical synthesis, 0.175 g of SnCl<sub>4</sub>·5H<sub>2</sub>O (99.0%, Shantou Xilong Chemical Factory) was dissolved in a mixed solvent containing 8 mL of ethanol (99.7%, Beijing Chemical Reagent Co.) and 50 μL of concentrated aqueous HCl (GR, Beijing Chemical Reagent Co.). The obtained solution was transferred to a 20 mL Teflon-lined stainless-steel autoclave, which was then heated at 150 °C for 24 h. After the autoclave cooled to room temperature, the product was collected by centrifugation, washed with deionized water and ethanol for several times, and dried at 70 °C for 12 h.

#### *Synthesis of SnO<sub>2</sub> Nanoparticles (nSnO<sub>2</sub>)*

SnO<sub>2</sub> nanoparticles were obtained by calcination of mesoporous SnO<sub>2</sub> nanospheres at 550 °C for 3 h.

### Enrichment of phosphopeptides.

In a typical experiment, the tryptic digests of β-casein were diluted to a certain concentration by binding buffer (50% ACN, 0.2% TFA, pH ~2). Then suspensions of the AP materials (typically 2 μg/μL) were added into 200 μL diluted peptide mixture for selective enrichment. The mixed solutions were vibrated at room temperature for 30 min. After centrifugation (typically 10000 rpm, Eppendorf centrifuge 5417R), the supernatants were removed. After being washed with binding

buffer for three times, the remained nanomaterials were redispersed in 5  $\mu\text{L}$  1.6 M ammonia aqueous solution for MALDI-MS analysis. For phosphopeptide enrichment of peptide mixture digested from nonfat milk, the dilution, binding, washing and elution steps were similar to  $\beta$ -casein digests.

### Instrumentation.

The products were characterized by scanning electron microscopy (SEM, Hitachi S4800, 5kV), X-ray diffraction (XRD, Rigaku Dmax-2000, Cu  $K\alpha$  radiation), transmission electron microscopy (TEM, FEI Tecnai T20, 200 kV), and high-resolution TEM (HRTEM, FEI Tecnai F30, 300 kV). Nitrogen adsorption-desorption measurements were performed using a Micromeritics ASAP 2010 instrument.

All MALDI-ToF MS spectra of the peptides were obtained by using a Bruker Daltonics ultraflex ToF mass spectrometer. The following voltage parameters were employed for MS analysis in our work: ion source 1, 25.00 kV; ion source 2, 22.35 kV; lens, 8.50 kV; reflector, 26.45 kV; reflector 2, 13.40 kV. The laser frequency was set on 200 Hz.

A mixture of 20 mg/mL 2, 5-DHB in 50% (v/v) ACN, 1% (v/v) phosphoric acid was introduced as the matrix. 0.5  $\mu\text{L}$  of the washing buffer and 0.5  $\mu\text{L}$  matrix solution were mixed on the plate, dried at room temperature for MALDI-ToF MS analysis.

### Figures and tables

#### 1 Characterization of the synthesized materials

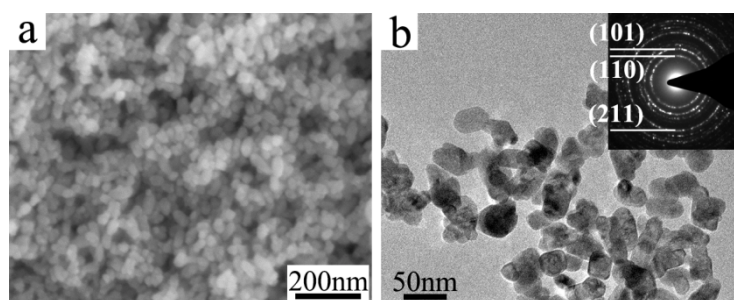

**Fig. S1** SEM (a) and TEM (b) images of  $\text{SnO}_2$  nanoparticles. The inset in (b) is the corresponding SAED pattern. The  $\text{SnO}_2$  nanoparticles show an average diameter of  $\sim 30$  nm.

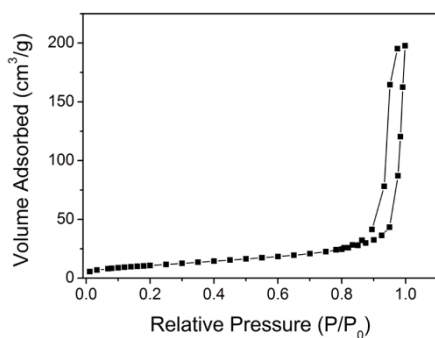

**Fig. S2** N<sub>2</sub> adsorption-desorption isotherm of SnO<sub>2</sub> nanoparticles. The SnO<sub>2</sub> nanoparticles have a BET surface area of 39.9 m<sup>2</sup>/g

## 2 Mass spectra

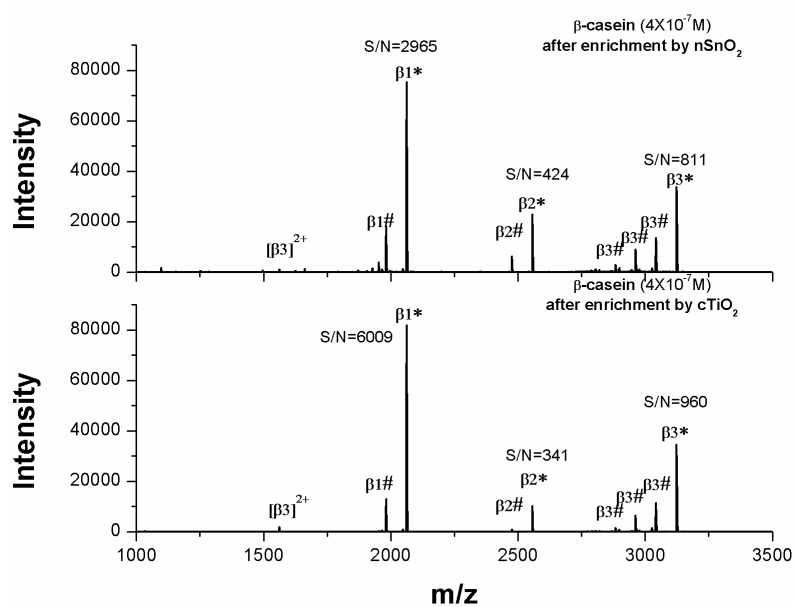

**Fig. S3** MS spectra derived from β-casein (4 × 10<sup>-7</sup> M) after enrichment by nSnO<sub>2</sub> and cTiO<sub>2</sub>

(nSnO<sub>2</sub>: non-porous SnO<sub>2</sub>, cTiO<sub>2</sub>: commercial TiO<sub>2</sub>)

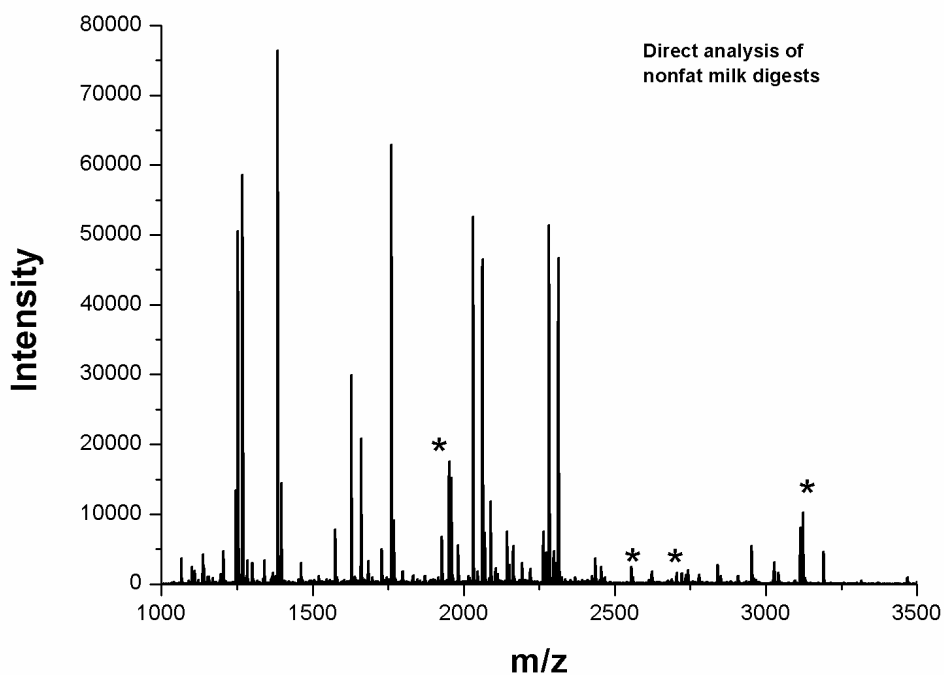

Fig. S4 MS spectra derived from nonfat milk digests without enrichment

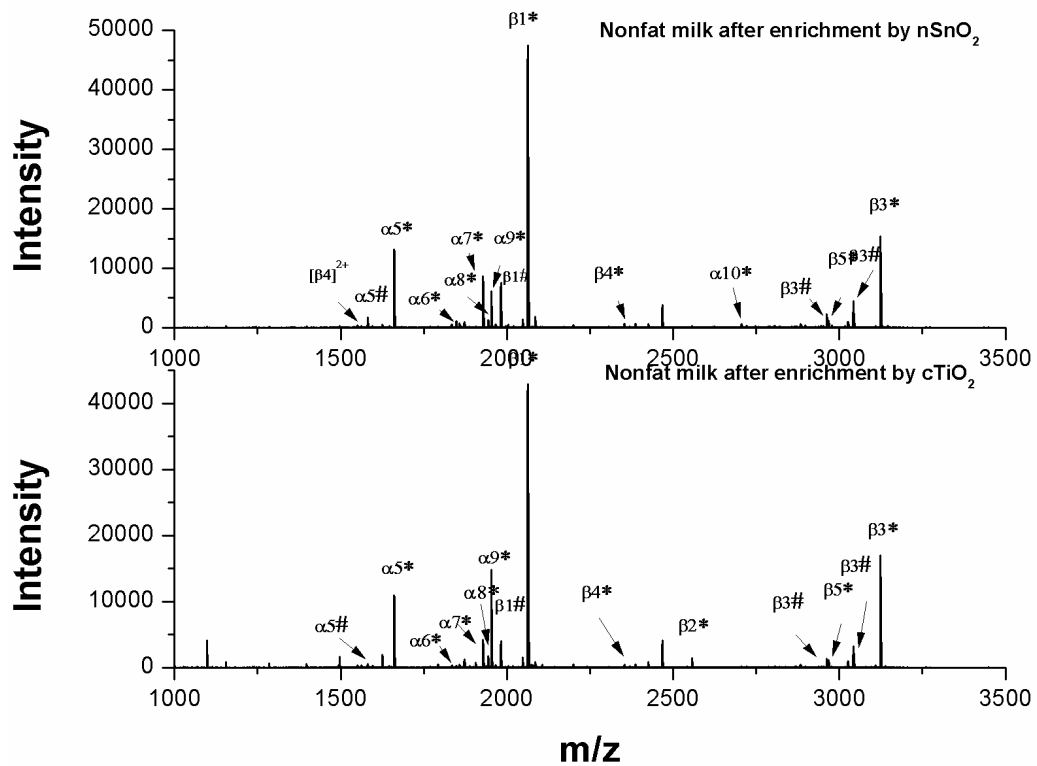

**Fig. S5** MS spectra derived from nonfat milk after enrichment by nSnO<sub>2</sub> and cTiO<sub>2</sub>

(nSnO<sub>2</sub>: non-porous SnO<sub>2</sub>, cTiO<sub>2</sub>: commercial TiO<sub>2</sub>)

**Table S1** Sequences of the detected phosphopeptides

| No.   | m/z     | Phosphorylation sites | Sequences                     | Protein     | mSnO <sub>2</sub> | SnO <sub>2</sub> | TiO <sub>2</sub> |
|-------|---------|-----------------------|-------------------------------|-------------|-------------------|------------------|------------------|
| α1*   | 1237.45 | 1                     | TVDMEpSTEVF                   | α-S2-casein | D                 | N                | N                |
| α2*   | 1253.56 | 1                     | TVD(oM)MEpSTEVF               | α-S2-casein | D                 | N                | N                |
| α3*   | 1466.59 | 1                     | TVDMEpSTEVFTK                 | α-S2-casein | D                 | N                | N                |
| α4*   | 1594.85 | 1                     | TVDMEpSTEVFTKK                | α-S2-casein | D                 | N                | N                |
| α5*   | 1660.77 | 1                     | VPQLEIVPNpSAEER               | α-S1-casein | D                 | D                | D                |
| α6*   | 1833.83 | 1                     | YLGEYLIVPNpSAEER              | α-S1-casein | D                 | D                | D                |
| α7*   | 1927.67 | 2                     | DIGpSEpSTEDQAMEDIK            | α-S1-casein | D                 | D                | D                |
| α8*   | 1943.66 | 2                     | DIGpSEpSTEDQA(oM)MEDIK        | α-S1-casein | D                 | D                | D                |
| α9*   | 1952.94 | 1                     | YKVPQLEIVPNpSAEER             | α-S1-casein | D                 | D                | D                |
| β1*   | 2061.81 | 1                     | FQpSEEQQTDELQDK               | β-casein    | D                 | D                | D                |
| β4*   | 2353.87 | 4                     | NVPGEIVepSlpSpSpSEESITR       | β-casein    | D                 | D                | D                |
| β2*   | 2557.06 | 1                     | FQpSEEQQTDELQDKIHFP           | β-casein    | D                 | N                | D                |
| α10*  | 2704.87 | 1                     | LRLKKYKVPQLEIVPNpSAEEERL      | α-S1-casein | D                 | D                | N                |
| α11*  | 2721.86 | 5                     | QMEAEpSlpSpSpSEIVPNPNpSVEQK   | α-S1-casein | D                 | N                | N                |
| α12*  | 2952.05 | 3                     | EKVNELpSKDIGpSEpSTEDQAMEDIK*  | α-S1-casein | D                 | N                | N                |
| β5*   | 2966.11 | 4                     | ELEELNVPGEIVepSlpSpSpSEESITR  | β-casein    | D                 | D                | D                |
| β3*   | 3123.22 | 4                     | RELEELNVPGEIVepSlpSpSpSEESITR | β-casein    | D                 | D                | D                |
| Total |         |                       |                               |             | 17                | 10               | 10               |

“oM” represents oxidation on methionine; D:detected N: non-detected
